# Supplementary material for: A family of uranyl-aromatic dicarboxylate (pht-, ipa-, tpa-) framework hybrid materials: photoluminescence, surface photovoltage and dye adsorption
Source: Royal Society of Chemistry journal article supplement (doi:10.1039/c5dt01470k), 2015-01-01
Supplement: c5dt01470k1.pdf [file c5dt01470k1.pdf]

## A family of Uranyl-aromatic dicarboxylate (pht-, ipa-, tpa-) framework hybrid materials: photoluminescent, surface photovoltage and dye adsorption

Xue Gao,<sup>a</sup> Che Wang,<sup>\*a</sup> Zhong-Feng Shi,<sup>c</sup> Jian Song,<sup>a</sup> Feng-Ying Bai,<sup>b</sup> Ji-Xiao Wang<sup>a</sup> and Yong-Heng Xing<sup>\*a</sup>

<sup>a</sup>*College of Chemistry and Chemical Engineering, Liaoning Normal University, Dalian City, 116029, China*

<sup>b</sup>*School of Life Science, Liaoning Normal University, Dalian City, 116029, China*

<sup>c</sup>*College of Chemistry and Chemical Engineering, Qinzhou University, Qinzhou 535099, PR China*

**Fig. S1** The Solid-state IR spectra of complex **1** at a room temperature.

**Fig. S2** The Solid-state IR spectra of complex **2** at a room temperature.

**Fig. S3** The Solid-state IR spectra of complex **3** at a room temperature.

**Fig. S4** The Solid-state IR spectra of complex **4** at a room temperature.

**Fig. S5** The TG curve for complex **1**.

**Fig. S6** The TG curve for complex **2**.

**Fig. S7** The TG curve for complex **3**.

**Fig. S8** The TG curve for complex **4**.

**Fig. S9** The UV-Vis spectra for complex **1**.

**Fig. S10** The UV-Vis spectra for complex **2**.

**Fig. S11** The UV-Vis spectra for complex **3**.

**Fig. S12** The UV-Vis spectra for complex **4**.

**Fig. S13** PXRD powder patterns: (a) the simulated PXRD pattern calculated from single-crystal structure of coordination polymer **1**, (b) experimental PXRD for coordination polymer **1**.

**Fig. S14** PXRD powder patterns: (a) the simulated PXRD pattern calculated from single-crystal structure of coordination polymer **2**, (b) experimental PXRD for coordination polymer **2**.

**Fig. S15** PXRD powder patterns: (a) the simulated PXRD pattern calculated from single-crystal structure of coordination polymer **3**, (b) experimental PXRD for coordination polymer **3**.

**Fig. S16** PXRD powder patterns: (a) the simulated PXRD pattern calculated from single-crystal structure of coordination polymer **4**, (b) experimental PXRD for coordination polymer **4**.

**Table S1** Hydrogen bond lengths (Å) and angles (°) for complexes **1-2**\*.

---

\* Corresponding author: Associate Professor of Chemistry Che Wang

E-mail address: [wangche126@126.com](mailto:wangche126@126.com);

\* Corresponding author: Professor of Chemistry Yong-Heng Xing

E-mail address: [xingyongheng2000@163.com](mailto:xingyongheng2000@163.com);

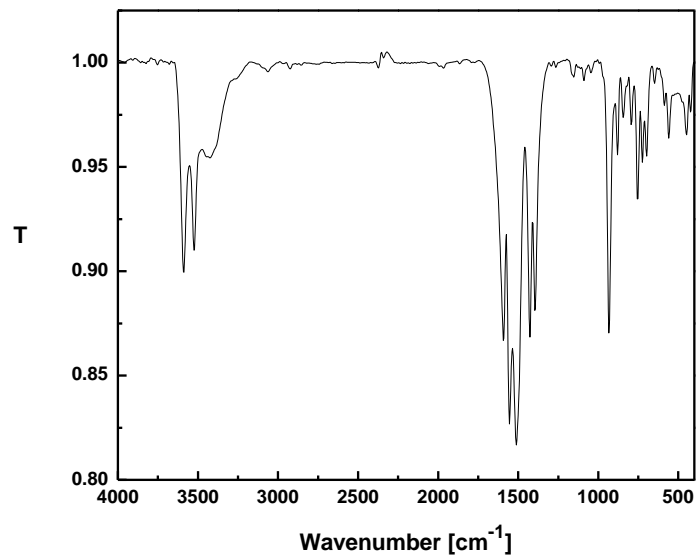

**Fig. S1** The Solid-state IR spectra of complex **1** at a room temperature.

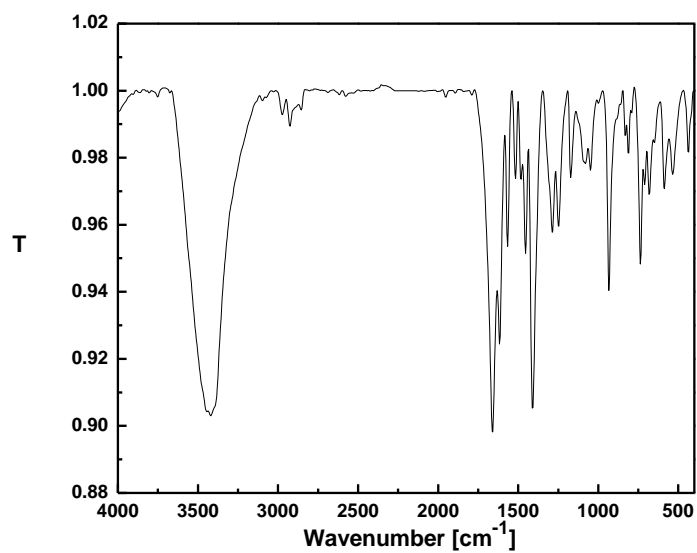

**Fig. S2** The Solid-state IR spectra of complex **2** at a room temperature.

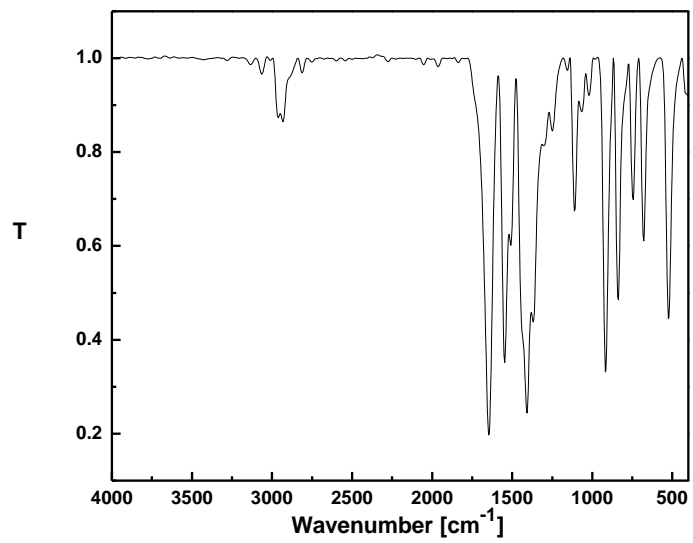

**Fig. S3** The Solid-state IR spectra of complex **3** at a room temperature.

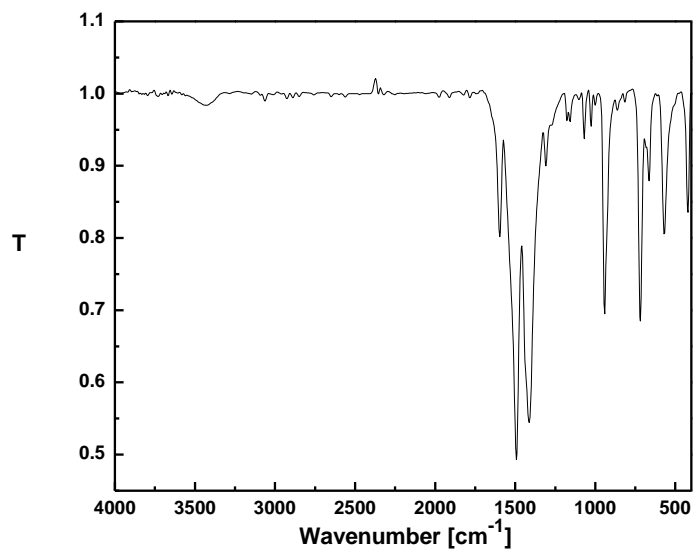

**Fig. S4** The Solid-state IR spectra of complex **4** at a room temperature.

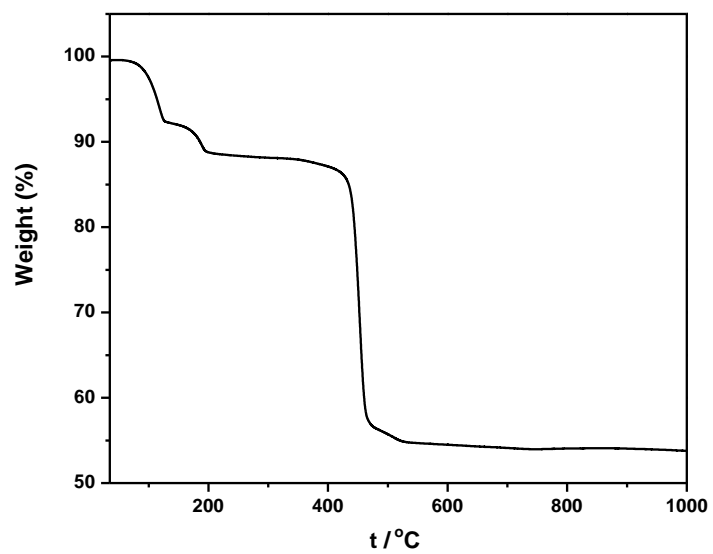

**Fig. S5** The TG curve for complex 1.

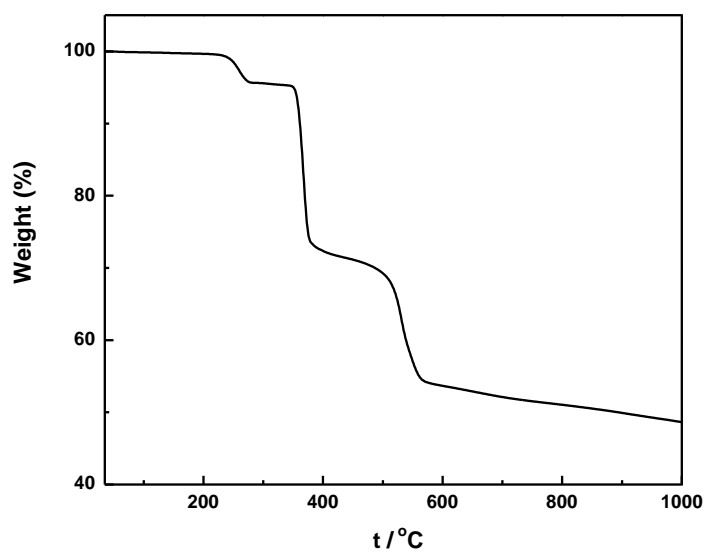

**Fig. S6** The TG curve for complex 2.

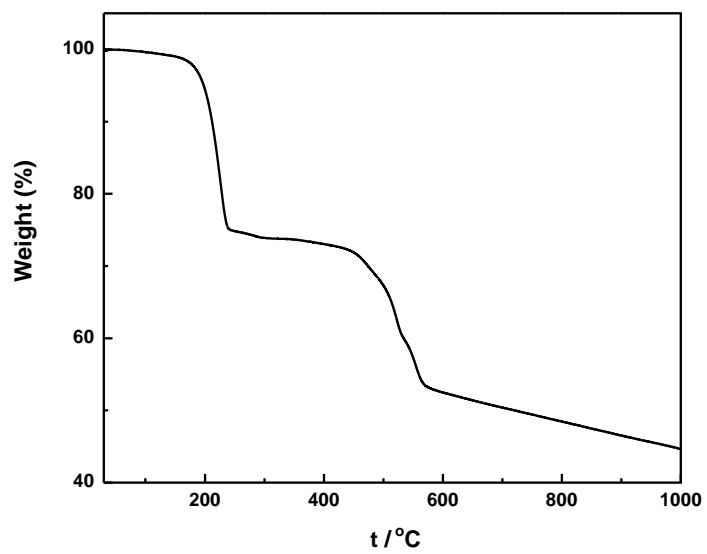

**Fig. S7** The TG curve for complex 3.

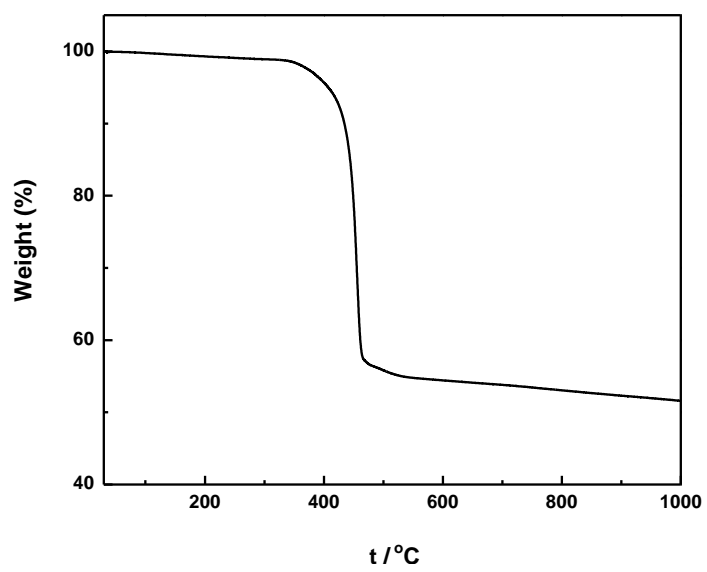

**Fig. S8** The TG curve for complex 4.

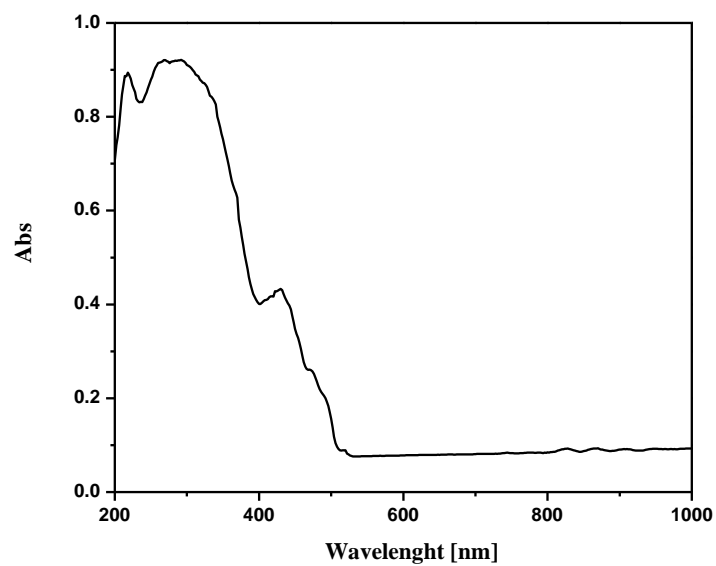

**Fig. S9** The UV-Vis spectra for complex 1.

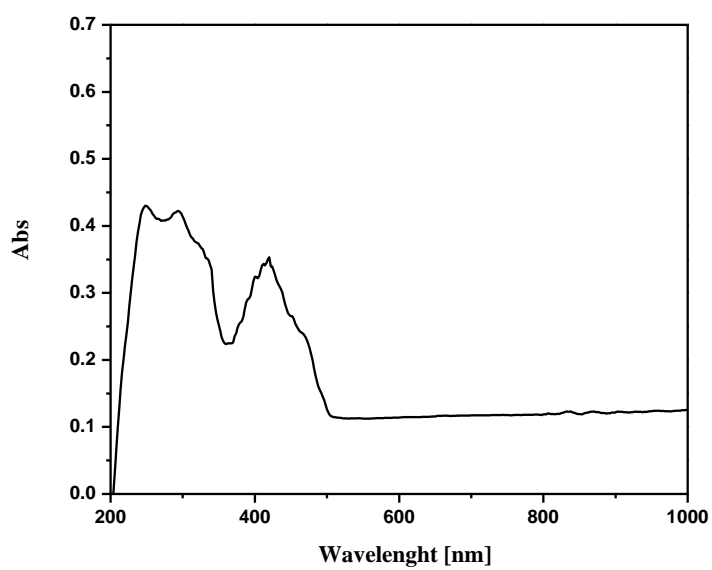

**Fig. S10** The UV-Vis spectra for complex 2.

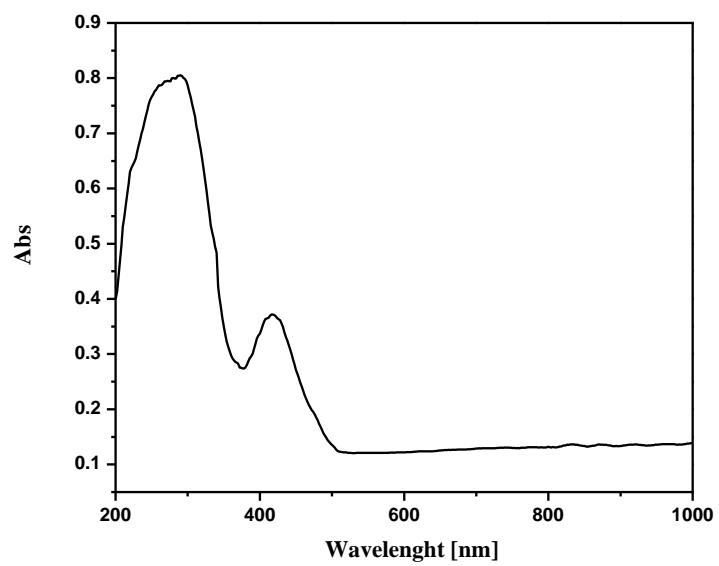

**Fig. S11** The UV-Vis spectra for complex 3.

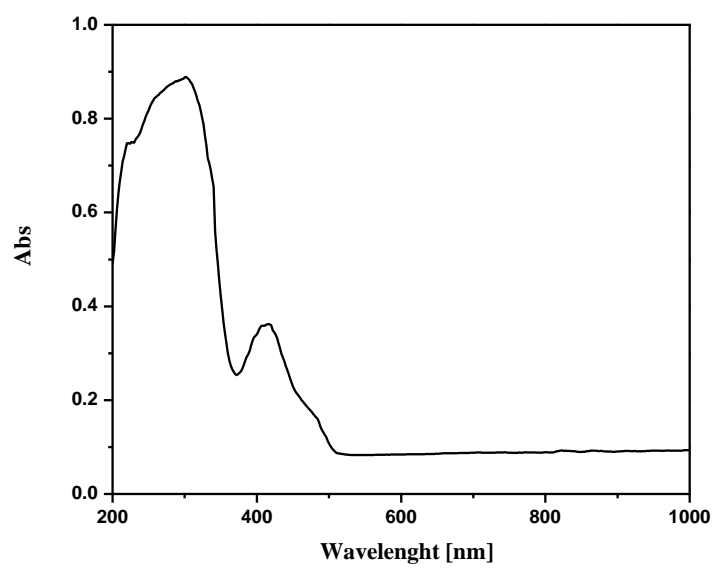

**Fig. S12** The UV-Vis spectra for complex 4.

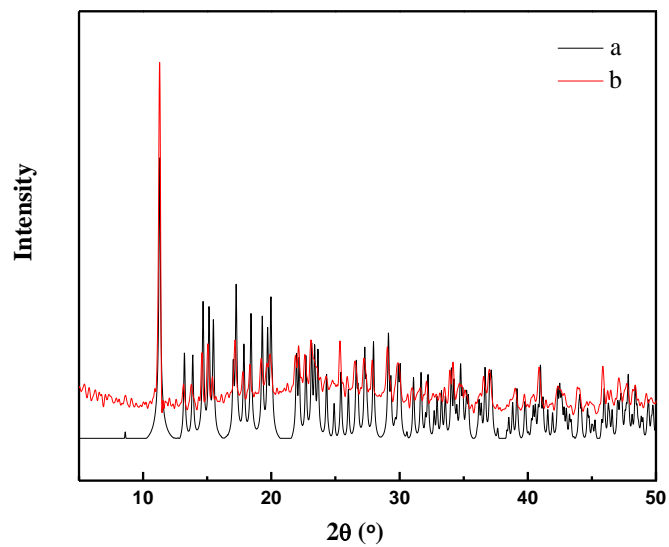

**Fig. S13** PXR D powder patterns: (a) the simulated PXR D pattern calculated from single-crystal structure of coordination polymer **1**, (b) experimental PXR D for coordination polymer **1**.

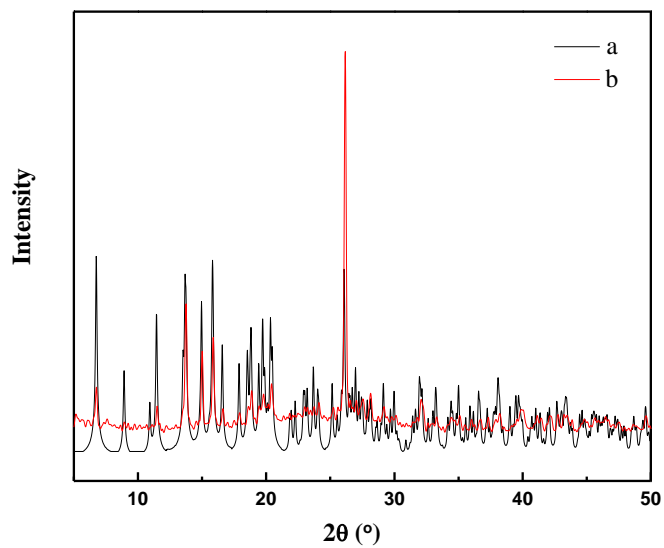

**Fig. S14** PXR D powder patterns: (a) the simulated PXR D pattern calculated from single-crystal structure of coordination polymer **2**, (b) experimental PXR D for coordination polymer **2**.



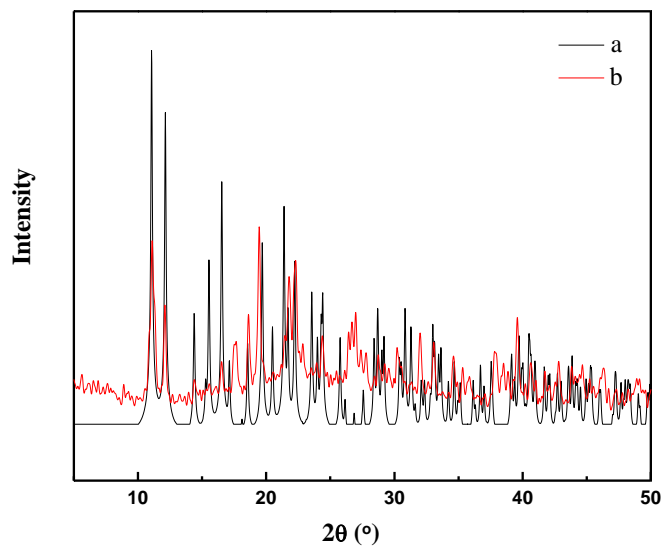

**Fig. S15** PXRD powder patterns: (a) the simulated PXRD pattern calculated from single-crystal structure of coordination polymer **3**, (b) experimental PXRD for coordination polymer **3**.

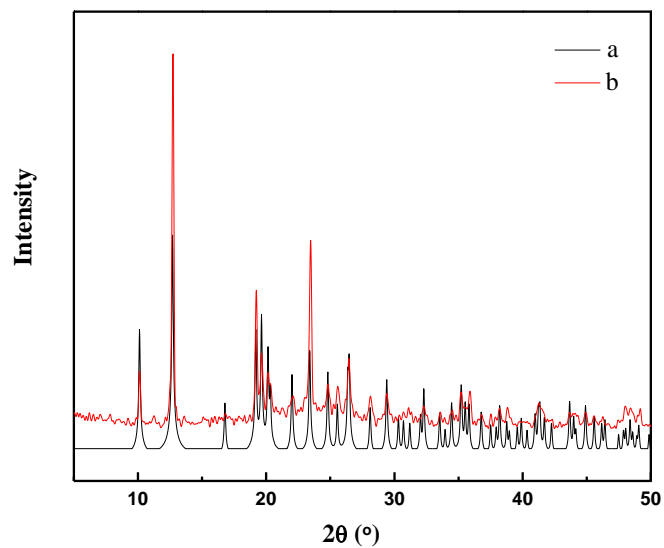

**Fig. S16** PXRD powder patterns: (a) the simulated PXRD pattern calculated from single-crystal structure of coordination polymer **4**, (b) experimental PXRD for coordination polymer **4**.

**Table S1** Hydrogen bond lengths (Å) and angles (°) for complexes **1-2**\*

| D–H···A                           | d(D–H)/Å | d(H···A)/Å | d(D···A)/Å | ∠D–H···A/° |
|-----------------------------------|----------|------------|------------|------------|
| <b>Complex 1</b>                  |          |            |            |            |
| O(1W)-H(1WB)···O(1) <sup>#4</sup> | 0.85     | 2.07       | 2.866(8)   | 154.6      |
| O(7)-H(7A)···O(1W) <sup>#5</sup>  | 0.85     | 1.98       | 2.687(7)   | 140.7      |
| <b>Complex 2</b>                  |          |            |            |            |
| O(7)-H(7C)···O(11) <sup>#2</sup>  | 0.85     | 2.25       | 2.818(5)   | 124.4      |
| O(8)-H(8)···O(3) <sup>#3</sup>    | 0.82     | 1.86       | 2.673(4)   | 168.3      |
| O(10)-H(10)···O(11) <sup>#4</sup> | 0.82     | 1.85       | 2.671(4)   | 175.1      |
| C(3)-H(3)···O(4) <sup>#1</sup>    | 0.93     | 2.45       | 3.369(4)   | 168.8      |
| C(13)-H(13)···O(1) <sup>#5</sup>  | 0.93     | 2.60       | 3.360(5)   | 139.6      |
| C(15)-H(15)···O(8) <sup>#3</sup>  | 0.93     | 2.47       | 3.358(5)   | 159.3      |

\*Symmetry transformation used to generate equivalent atoms: complex **1**: #4: x, y+1, z,

#5: -x+1, -y+1, -z+1; complex **2**: #1: -x, -y+1, -z+2, #2: x-1, y+1, z, #3: -x, -y+1, -z+1, #4:

-x+1, -y-1, -z+1, #5: x+1, y-1, z.
